# Supplementary material
Source: Research Square preprint supplement (doi:10.21203/rs.3.rs-9574845/v1)
Supplement: Supplementary file 1 [file 50681733b7f4ede953b0b8cb.docx]

**ADDITIONAL INFORMATION**

***Additional table 1*** *“Additional table 1. Model structures and sample sizes.docx”*

***Additional table 2*** *“Additional table 2. Model outputs.docx”*

*A****dditional table 3*** *“Additional table 3. Effects of active period duration on orangutan daily path length.docx”*

***Additional table 4*** *“Additional table 4. Effects of residual waypoint number on orangutan movement metrics.docx***”**

***Additional table 1. Model structures and sample sizes.*** *Statistically significant results are shown in bold.*

| **Model number** | **Dataset** | **Model** | **Sample size** |
| --- | --- | --- | --- |
| **POPULATION LEVEL** | | | |
| *Model1_DPL* | **All individuals** | lmer(DPL ~ **%TimeInAssociation** + **FocalAgeSexClass** + **FruitAvailability** + Rainfall + (1|focalID)) | *971* |
| *Model1_Sin* | **All individuals** | lmer(Sinuosity ~ %TimeInAssociation + **FocalAgeSexClass** + FruitAvailability + **TotalWaypointsPerPath** + Rainfall + (1|focalID)) | *992* |
| *Model1_NrH* | **All individuals** | glmmTMB(NoOfHotspotsPerFollow ~ **%TimeInAssociation** + **FocalAgeSexClass** + FruitAvailability + **ActivePeriodDuration** + Rainfall + (1|focalID), family = compois() ) | *1235* |
| *Model1_Time* | **All individuals** | lmer(log(TimeInAHotspot) ~ **%TimeInAssociationAtHotspot** + **FocalAgeSexClass** + FruitAvailability + ActivePeriodDuration + Rainfall + (1|focalID) + (1|followID)) | *6571* |
| **WITHIN CLASS LEVEL** | | | |
| **DAILY PATH LENGTH** | | | |
| *Model2_DPL_UF* | **Unflanged Males** | lmer(DPL ~ %TimeInAssociation + FruitAvailability + Rainfall + (1|focalID) ) | *62* |
| *Model2_DPL_FL* | **Flanged Males** | lmer(DPL ~ %TimeInAssociation + FruitAvailability + Rainfall + (1|focalID) ) | *201* |
| *Model2_DPL_M* | **Mothers** | lmer(DPL ~ %TimeInAssociation + FruitAvailability + Rainfall + (1|focalID) ) | *500* |
| *Model2_DPL_I* | **Immatures** | lmer(DPL ~ %TimeInAssociation + FruitAvailability + Rainfall + (1|focalID) ) | *208* |
| **DAILY SINUOSITY** | | | |
| *Model2_Sin_UF* | **Unflanged Males** | lmer(Sinuosity ~ %TimeInAssociation + **TotalWaypointsPerPath** + FruitAvailability + **Rainfall** + (1|focalID) ) | *64* |
| *Model2_Sin_FL* | **Flanged Males** | lmer(Sinuosity ~ %TimeInAssociation + **TotalWaypointsPerPath** + **FruitAvailability** + Rainfall + (1|focalID) ) | *207* |
| *Model2_Sin_M* | **Mothers** | lmer(Sinuosity ~ %TimeInAssociation + **TotalWaypointsPerPath** + FruitAvailability + Rainfall + (1|focalID) ) | *508* |
| *Model2_Sin_I* | **Immatures** | lmer(Sinuosity ~ %TimeInAssociation + TotalWaypointsPerPath + FruitAvailability + Rainfall + (1|focalID) ) | *213* |
| **NUMBER OF HOTSPOTS VISITED PER DAY** | | | |
| *Model2_NrH_UF* | **Unflanged Males** | glmmTMB(NoOfHotspotsPerFollow ~ %TimeInAssociation + ActivePeriodDuration + FruitAvailability + Rainfall + (1|focalID), family = compois() ) | *89* |
| *Model2_NrH_FL* | **Flanged Males** | glmmTMB(NoOfHotspotsPerFollow ~ **%TimeInAssociation**  + **ActivePeriodDuration** + FruitAvailability + Rainfall + (1|focalID), family = compois() ) | *250* |
| *Model2_NrH_M* | **Mothers** | glmmTMB(NoOfHotspotsPerFollow ~ **%TimeInAssociation**  + **ActivePeriodDuration** + FruitAvailability + Rainfall + (1|focalID), family = compois() ) | *615* |
| *Model2_NrH_I* | **Immatures** | glmmTMB(NoOfHotspotsPerFollow ~ %TimeInAssociation + ActivePeriodDuration + FruitAvailability + Rainfall + (1|focalID), family = compois() ) | *281* |
| **TIME IN A HOTSPOT** | | | |
| *Model2_Time_UF* | **Unflanged Males** | lmer(log(TimeInAHotspot) ~ %TimeInAssociationAtHotspot + ActivePeriodDuration + FruitAvailability + Rainfall + (1|focalID) + (1|followID)) | *610* |
| *Model2_Time_FL* | **Flanged Males** | lmer(log(TimeInAHotspot) ~ **%TimeInAssociationAtHotspot** + ActivePeriodDuration + FruitAvailability + Rainfall + (1|focalID) + (1|followID)) | *1664* |
| *Model2_Time_M* | **Mothers** | lmer(log(TimeInAHotspot) ~ %TimeInAssociationAtHotspot + ActivePeriodDuration + FruitAvailability + Rainfall + (1|focalID) + (1|followID)) | *2932* |
| *Model2_Time_I* | **Immatures** | lmer(log(TimeInAHotspot) ~ %TimeInAssociation AtHotspot + ActivePeriodDuration + FruitAvailability + Rainfall + (1|focalID) + (1|followID)) | *1365* |
| **DYADIC LEVEL** | | | |
| **DAILY PATH LENGTH** | | | |
| *Model3_DPL_UF* | **Unflanged Males** | lmer(DPL ~ PresenceUnflanged + PresenceFlanged + PresenceMother + PresenceImmature + FruitAvailability + Rainfall + (1|focalID) ) | *28* |
| *Model3_DPL_FL*  *** | **Flanged Males** | lmer(DPL ~ PresenceUnflanged + PresenceMother + PresenceImmature + FruitAvailability + Rainfall + (1|focalID) ) | *65* |
| *Model3_DPL_M* | **Mothers** | lmer(DPL ~ PresenceUnflanged + **PresenceFlanged** + PresenceMother + PresenceImmature + FruitAvailability + Rainfall + (1|focalID) ) | *487* |
| *Model3_DPL_I* | **Immatures** | lmer(DPL ~ PresenceUnflanged + PresenceFlanged + PresenceMother + PresenceImmature + FruitAvailability + Rainfall + (1|focalID) ) | *115* |
| **DAILY SINUOSITY** | | | |
| *Model3_Sin_UF* | **Unflanged Males** | lmer(Sinuosity ~ PresenceUnflanged + PresenceFlanged + PresenceMother + **PresenceImmature** + **TotalWaypointsPerPath** + FruitAvailability + **Rainfall** + (1|focalID) ) | *28* |
| *Model3_Sin_FL*  *** | **Flanged Males** | lmer(Sinuosity ~ PresenceUnflanged + + PresenceMother + PresenceImmature + **TotalWaypointsPerPath** + FruitAvailability + Rainfall + (1|focalID) ) | *65* |
| *Model3_Sin_M* | **Mothers** | lmer(Sinuosity ~ PresenceUnflanged + **PresenceFlanged** + PresenceMother + PresenceImmature + **TotalWaypointsPerPath** + **FruitAvailability** + Rainfall + (1|focalID) ) | *495* |
| *Model3_Sin_I* | **Immatures** | lmer(Sinuosity ~ PresenceUnflanged + PresenceFlanged + PresenceMother + PresenceImmature + TotalWaypointsPerPath + FruitAvailability + Rainfall + (1|focalID) ) | *115* |
| **NUMBER OF HOTSPOTS VISITED PER DAY** | | | |
| *Model3_NrH_UF* | **Unflanged Males** | glmmTMB (NoOfHotspotsPerFollow ~ PresenceUnflanged + PresenceFlanged + PresenceMother + PresenceImmature + ActivePeriodDuration + FruitAvailability + Rainfall + (1|focalID), family = compois()) | *44* |
| *Model3_NrH_FL* | **Flanged Males** | glmmTMB (NoOfHotspotsPerFollow ~ PresenceUnflanged + PresenceFlanged + PresenceMother + PresenceImmature + ActivePeriodDuration + FruitAvailability + Rainfall + (1|focalID), family = compois()) | *90* |
| *Model3_NrH_M* | **Mothers** | glmmTMB (NoOfHotspotsPerFollow ~ **PresenceUnflanged** + **PresenceFlanged** + PresenceMother + PresenceImmature + **ActivePeriodDuration** + FruitAvailability + Rainfall + (1|focalID), family = compois()) | *600* |
| *Model3_NrH_I* | **Immatures** | glmmTMB (NoOfHotspotsPerFollow ~ PresenceUnflanged + PresenceFlanged + PresenceMother + PresenceImmature + ActivePeriodDuration + FruitAvailability + Rainfall + (1|focalID), family = compois()) | *163* |
| **TIME IN A HOTSPOT** | | | |
| *Model3_Time_UF* | **Unflanged Males** | lmer(log(TimeInAHotspot) ~ PresenceUnflanged + PresenceFlanged + PresenceMother + PresenceImmature + ActivePeriodDuration + FruitAvailability + Rainfall +(1|focalID) + (1|followID)) | *610* |
| *Model3_Time_FL* | **Flanged Males** | lmer(log(TimeInAHotspot) ~ PresenceUnflanged + PresenceFlanged + PresenceMother + PresenceImmature + ActivePeriodDuration + FruitAvailability + Rainfall + (1|focalID) + (1|followID)) | *1664* |
| *Model3_Time_M* | **Mothers** | lmer(log(TimeInAHotspot) ~ PresenceUnflanged + **PresenceFlanged** + **PresenceMother** + PresenceImmature + ActivePeriodDuration + FruitAvailability + Rainfall + (1|focalID) + (1|followID)) | *2932* |
| *Model3_Time_I* | **Immatures** | lmer(log(TimeInAHotspot) ~ PresenceUnflanged + PresenceFlanged + PresenceMother + PresenceImmature + ActivePeriodDuration + FruitAvailability + Rainfall + (1|focalID) + (1|followID)) | *1365* |

** There were no data available on the presence of flanged males with other flanged males for full-day follows with sufficient GPS data for use in* ***Model3_DPL_FL*** *and* ***Model3_Sin_FL***

***Additional table 2: Fixed and random effects from linear and generalised linear mixed-effects models investigating predictors of movement behaviour****. Response variables include daily path length, path sinuosity, number of hotspots visited per day, and log-transformed time spent in a hotspot. Fixed effects comprised social association metrics, fruit availability, rainfall, number of GPS waypoints, and active period duration variables. Random intercepts were fitted for focal identity (and follow identity when applicable). Marginal and conditional R² values are reported.*

| **Model** | **Response** | **Predictors** | **Estimates** | **Std. Error** | **Statistic** | ***p*** | **Marginal R2 / Conditional R2** |
| --- | --- | --- | --- | --- | --- | --- | --- |
| Model_1_DPL | **Daily Path Length** | **Fixed effects** |  |  |  |  |  |
| *n = 971 observations;* | (Intercept) | 1033.597 | 74.955 | 13.790 | *< 0.001* | 0.026 / 0.145 |
| *70 individuals* | Class [Independent Immature] | 78.071 | 73.159 | 1.067 | *0.286* |  |
|  | Class [Mother] | -25.897 | 74.693 | -0.347 | *0.729* |  |
|  | Class [Unflanged Male] | 200.289 | 87.658 | 2.285 | ***0.023*** |  |
|  | % Time in association | 68.667 | 32.069 | 2.141 | *0.033* |  |
|  | **Controls** |  |  |  |  |  |
|  | Fruit availability | 10.076 | 5.112 | 1.971 | ***0.049*** |  |
|  | Rainfall | -0.554 | 0.960 | -0.577 | ***0.564*** |  |
|  | **Random effects** | **Variance** | **SD** |  |  |  |
|  | Focal ID (Intercept) | 26746.000 | 163.500 |  |  |  |
|  | Residual | 192963.000 | 439.300 |  |  |  |
| Model_1_Sin | **Daily Sinuosity** | **Fixed effects** |  |  |  |  |  |
| *n = 992 observations;* | (Intercept) | 0.164 | 0.018 | 8.967 | *<0.001* | 0.091 / 0.150 |
| *72 individuals* | Class [Independent Immature] | 0.006 | 0.008 | 0.779 | *0.436* |  |
|  | Class [Mother] | 0.021 | 0.008 | 2.727 | *0.011* |  |
|  | Class [Unflanged Male] | -0.018 | 0.009 | -1.939 | *0.055* |  |
|  | % Time in association | -0.008 | 0.004 | -1.938 | *0.053* |  |
|  | **Controls** |  |  |  |  |  |
|  | Fruit availability | 0.000 | 0.001 | 0.230 | *0.710* |  |
|  | Total waypoints per path | 0.002 | 0.000 | 6.870 | *<0.001* |  |
|  | Rainfall | 0.000 | 0.000 | 0.670 | *0.560* |  |
|  | **Random Effects** | **Variance** | **SD** |  |  |  |
|  | Focal ID (Intercept) | 0.000 | 0.014 |  |  |  |
|  | Residual | 0.003 | 0.054 |  |  |  |
| Model_1_NrH | **Number of hotspots visited per day** | **Fixed effects** |  |  |  |  |  |
| *n = 1235 observations;* | (Intercept) | 1.033 | 0.140 | 7.379 | <0.001 | 0.013 / 0.027 |
| *87 individuals* | Class [Independent Immature] | -0.165 | 0.047 | -3.473 | <0.001 |  |
|  | Class [Mother] | -0.137 | 0.048 | -2.871 | 0.004 |  |
|  | Class [Unflanged Male] | -0.179 | 0.060 | -3.007 | 0.003 |  |
|  | % Time in association | -0.129 | 0.025 | -5.078 | <0.001 |  |
|  | **Controls** |  |  |  |  |  |
|  | Fruit availability | 0.005 | 0.004 | 1.285 | 0.199 |  |
|  | Active period duration | 0.056 | 0.012 | 4.662 | <0.001 |  |
|  | Rainfall | -0.001 | 0.001 | -0.942 | 0.346 |  |
|  | **Random effects** | **Variance** | **SD** |  |  |  |
|  | Focal ID (Intercept) | 0.009 | 0.096 |  |  |  |
|  | Residual | NA | NA |  |  |  |
| Model_1_Time | **Log(Time in a hotspot)** | **Fixed effects** |  |  |  |  |  |
| *n = 6571 observations;* | (Intercept) | 3.886 | 0.030 | 131.069 | <0.001 | **0.009 / 0.053** |
| *110 individuals;* | Class [Independent Immature] | -0.076 | 0.021 | -3.655 | <0.001 |  |
| *2154 follows* | Class [Mother] | -0.064 | 0.020 | -3.155 | 0.003 |  |
|  | Class [Unflanged Male] | -0.034 | 0.024 | -1.417 | 0.159 |  |
|  | % Time in association at hotspot | -0.041 | 0.011 | -3.649 | <0.001 |  |
|  | **Controls** |  |  |  |  |  |
|  | Fruit availability | 0.003 | 0.002 | 1.772 | 0.077 |  |
|  | Active period duration | 0.002 | 0.002 | 1.250 | 0.212 |  |
|  | Rainfall | -0.000 | 0.000 | -0.457 | 0.647 |  |
|  | **Random effects** | **Variance** | **SD** |  |  |  |
|  | Focal ID (Intercept) | 0.006 | 0.078 |  |  |  |
|  | Follow ID (Intercept) | 0.001 | 0.036 |  |  |  |
|  | Residual | 0.160 | 0.400 |  |  |  |
| **Model2_DPL_UF** | **Daily path length**  *(Unflanged Male)* | **Fixed effects** |  |  |  |  |  |
| *n = 62 observations;* | (Intercept) | 1060.112 | 220.375 | 4.811 | *< 0.001* | 0.118 / NA |
| *20 individuals* | % Time in association | 291.823 | 131.147 | 2.225 | *0.030* |  |
|  | **Controls** |  |  |  |  |  |
|  | Fruit availability | 12.879 | 20.835 | 0.666 | *0.508* |  |
|  | Rainfall | 15.279 | 9.733 | 1.570 | *0.122* |  |
|  | **Random effects** | **Variance** | **SD** |  |  |  |
|  | Focal ID (Intercept) | 0.000 | 0.000 |  |  |  |
|  | Residual | 254680.000 | 504.700 |  |  |  |
| **Model2_DPL_FL**  *n = 201 observations;*  *17 individuals* | **Daily path length**  *(Flanged Male)* | **Fixed effects** |  |  |  |  |  |
| (Intercept) | 865.013 | 123.148 | 7.024 | *< 0.001* | **0.040 / 0.076** |
| % Time in association | 90.643 | 80.540 | 1.125 | *0.262* |  |
|  | **Controls** |  |  |  |  |  |
|  | Fruit availability | 27.511 | 11.074 | 2.484 | *0.014* |  |
|  | Rainfall | -4.369 | 6.095 | -0.717 | *0.474* |  |
|  | **Random effects** | **Variance** | **SD** |  |  |  |
|  | Focal ID (Intercept) | 9440.000 | 97.160 |  |  |  |
|  | Residual | 243866.000 | 493.830 |  |  |  |
| **Model2_DPL_M** | **Daily path length**  *(Mother)* | **Fixed effects** |  |  |  |  |  |
| *n = 500 observations;* | (Intercept) | 1093.310 | 74.605 | 14.655 | *< 0.001* | **0.002 / 0.011** |
| *16 individuals* | % Time in association | 33.083 | 42.350 | 0.781 | *0.435* |  |
|  | **Controls** |  |  |  |  |  |
|  | Fruit availability | -1,271 | 6.695 | -0.190 | *0.849* |  |
|  | Rainfall | -0.604 | 0.949 | -0.643 | *0.520* |  |
|  | **Random effects** | **Variance** | **SD** |  |  |  |
|  | Focal ID (Intercept) | 1542.000 | 39.270 |  |  |  |
|  | Residual | 165740.000 | 407.110 |  |  |  |
| **Model2_DPL_I** | **Daily path length**  *(Independent Immature)* | **Fixed effects** |  |  |  |  |  |
| *n = 208 observations;* | (Intercept) | 1253.880 | 132.185 | 9.486 | *< 0.001* | **0.003 / 0.259** |
| *21 individuals* | % Time in association | 49.014 | 65.299 | 0.751 | *0.454* |  |
|  | **Controls** |  |  |  |  |  |
|  | Fruit availability | -1.876 | 12.401 | -0.151 | *0.880* |  |
|  | Rainfall | -0.974 | 3.784 | -0.257 | *0.797* |  |
|  | **Random effects** | **Variance** | **SD** |  |  |  |
|  | Focal ID (Intercept) | 63156.000 | 251.300 |  |  |  |
|  | Residual | 182278.000 | 426.900 |  |  |  |
| **Model2_Sin_UF** | **Daily Sinuosity**  *(Unflanged Male)* | **Fixed effects** |  |  |  |  |  |
| *n = 64 observations;* | (Intercept) | 0.124 | 0.067 | 1.869 | *0.067* | **0.205 / 0.281** |
| *20 individuals* | % Time in association | -0.007 | 0.014 | -0.462 | *0.646* |  |
|  | **Controls** |  |  |  |  |  |
|  | Fruit availability | -0.003 | 0.002 | -1.254 | *0.215* |  |
|  | Total waypoints per path | 0.003 | 0.001 | 2.782 | *0.007* |  |
|  | Rainfall | -0.002 | 0.001 | -2.124 | *0.038* |  |
|  | **Random effects** | **Variance** | **SD** |  |  |  |
|  | Focal ID (Intercept) | 0.000 | 0.017 |  |  |  |
|  | Residual | 0.003 | 0.052 |  |  |  |
| **Model2_Sin_FL** | **Daily Sinuosity**  *(Flanged Male)* | **Fixed effects** |  |  |  |  |  |
| *n = 207 observations;* | (Intercept) | 0.150 | 0.041 | 3.671 | *<0.001* | **0.088 0.127** |
| *18 individuals* | % Time in association | -0.012 | 0.010 | -1.135 | *0.258* |  |
|  | **Controls** |  |  |  |  |  |
|  | Fruit availability | -0.003 | 0.001 | -2.461 | *0.015* |  |
|  | Total waypoints per path | 0.002 | 0.001 | 3.898 | *<0.001* |  |
|  | Rainfall | -0.000 | 0.001 | -0.491 | *0.624* |  |
|  | **Random effects** | **Variance** | **SD** |  |  |  |
|  | Focal ID (Intercept) | 0.000 | 0.013 |  |  |  |
|  | Residual | 0.004 | 0.062 |  |  |  |
| **Model2_Sin_M** | **Daily Sinuosity**  *(Mother)* | **Fixed effects** |  |  |  |  |  |
| *n = 508 observations;* | (Intercept) | 0.164 | 0.025 | 6.623 | *<0.001* | **0.056 / 0.059** |
| *16 individuals* | % Time in association | -0.003 | 0.005 | -0.663 | *0.508* |  |
|  | **Controls** |  |  |  |  |  |
|  | Fruit availability | 0.001 | 0.001 | 1.757 | *0.080* |  |
|  | Total waypoints per path | 0.002 | 0.000 | 5.036 | *<0.001* |  |
|  | Rainfall | 0.000 | 0.000 | 1.426 | *0.154* |  |
|  | **Random effects** | **Variance** | **SD** |  |  |  |
|  | Focal ID (Intercept) | 0.000 | 0.003 |  |  |  |
|  | Residual | 0.002 | 0.050 |  |  |  |
| **Model2_Sin_I** | **Daily Sinuosity**  *(Independent Immature)* | **Fixed effects** |  |  |  |  |  |
| *n = 213 observations;* | (Intercept) | 0.230 | 0.038 | 6.050 | *<0.001* | **0.027 / 0.164** |
| *22 individuals* | % Time in association | -0.012 | 0.008 | -1.523 | *0.129* |  |
|  | **Controls** |  |  |  |  |  |
|  | Fruit availability | 0.001 | 0.001 | 0.420 | *0.675* |  |
|  | Total waypoints per path | 0.001 | 0.001 | 1.348 | *0.179* |  |
|  | Rainfall | -0.001 | 0.000 | -1.260 | *0.209* |  |
|  | **Random effects** | **Variance** | **SD** |  |  |  |
|  | Focal ID (Intercept) | 0.000 | 0.021 |  |  |  |
|  | Residual | 0.003 | 0.051 |  |  |  |
| Model2_NrH_UF | **Number of hotspots visited per day**  *(Unflanged Male)* | **Fixed effects** |  |  |  |  |  |
| *n = 89 observations;* | (Intercept) | 0.702 | 0.523 | 1.341 | *0.180* | 0.015 / NA |
| *26 individuals* | % Time in association | -0.173 | 0.093 | -1.864 | *0.062* |  |
|  | **Controls** |  |  |  |  |  |
|  | Fruit availability | 0.013 | 0.015 | 0.827 | *0.408* |  |
|  | Active period duration | 0.065 | 0.044 | 1.470 | *0.142* |  |
|  | Rainfall | -0.007 | 0.007 | -1.038 | *0.299* |  |
|  | **Random effects** | **Variance** | **SD** |  |  |  |
|  | Focal ID (Intercept) | 0.000 | 0.000 |  |  |  |
|  | Residual | NA | NA |  |  |  |
| Model2_NrH_FL | **Number of hotspots visited per day**  *(Flanged Male)* | **Fixed effects** |  |  |  |  |  |
| *n = 250 observations;* | (Intercept) | 0.829 | 0.238 | 3.488 | *<0.001* | 0.016 / 0.022 |
| *23 individuals* | % Time in association | -0.116 | 0.050 | -2.325 | *0.020* |  |
|  | **Controls** |  |  |  |  |  |
|  | Fruit availability | 0.012 | 0.007 | 1.867 | *0.062* |  |
|  | Active period duration | 0.068 | 0.022 | 3.158 | *0.002* |  |
|  | Rainfall | 0.002 | 0.004 | 0.421 | *0.674* |  |
|  | **Random effects** | **Variance** | **SD** |  |  |  |
|  | Focal ID (Intercept) | 0.004 | 0.061 |  |  |  |
|  | Residual | NA | NA |  |  |  |
| Model2_NrH_M | **Number of hotspots visited per day**  *(Mother)* | **Fixed effects** |  |  |  |  |  |
| *n = 615 observations;* | (Intercept) | 0.822 | 0.232 | 3.546 | *<0.001* | 0.008 / 0.021 |
| *19 individuals* | % Time in association | -0.125 | 0.040 | -3.110 | *0.002* |  |
|  | **Controls** |  |  |  |  |  |
|  | Fruit availability | -0.000 | 0.006 | -0.028 | *0.977* |  |
|  | Active period duration | 0.066 | 0.020 | 3.330 | *<0.001* |  |
|  | Rainfall | -0.001 | 0.001 | -0.626 | *0.531* |  |
|  | **Random effects** | **Variance** | **SD** |  |  |  |
|  | Focal ID (Intercept) | 0.011 | 0.105 |  |  |  |
|  | Residual | NA | NA |  |  |  |
| Model2_NrH_I | **Number of hotspots visited per day**  *(Independent immature)* | **Fixed effects** |  |  |  |  |  |
| *n = 281 observations;* | (Intercept) | 1.282 | 0.285 | 4.505 | *<0.001* | 0.008 / 0.035 |
| *25 individuals* | % Time in association | -0.121 | 0.047 | -2.563 | *0.010* |  |
|  | **Controls** |  |  |  |  |  |
|  | Fruit availability | 0.005 | 0.009 | 0.558 | *0.577* |  |
|  | Active period duration | 0.021 | 0.024 | 0.883 | *0.377* |  |
|  | Rainfall | -0.003 | 0.003 | -1.024 | *0.306* |  |
|  | **Random effects** | **Variance** | **SD** |  |  |  |
|  | Focal ID (Intercept) | 0.016 | 0.127 |  |  |  |
|  | Residual | NA | NA |  |  |  |
| **Model2_Time_UF** | **log(Time in a hotspot)** *(Unflanged Male)* | **Fixed effects** |  |  |  |  |  |
| *n = 610 observations;* | (Intercept) | 3.907 | 0.075 | 52.093 | <0.001 | NA / 0.009 |
| *39 individuals;* | % Time in association at hotspot | -0.060 | 0.034 | -1.779 | 0.076 |  |
| *259 follows* | **Controls** |  |  |  |  |  |
|  | Fruit availability | -0.004 | 0.006 | -0.717 | 0.474 |  |
|  | Active period duration | 0.006 | 0.005 | 1.103 | 0.271 |  |
|  | Rainfall | -0.001 | 0.002 | -0.691 | 0.490 |  |
|  | **Random effects** | **Variance** | **SD** |  |  |  |
|  | Focal ID (Intercept) | 0.000 | 0.000 |  |  |  |
|  | Follow ID (Intercept) | 0.001 | 0.035 |  |  |  |
|  | Residual | 0.156 | 0.394 |  |  |  |
| **Model2_Time_FL** | **log(Time in a hotspot)** *(Flanged Male)* | **Fixed effects** |  |  |  |  |  |
| *n = 1664 observations;* | (Intercept) | 3.829 | 0.055 | 69.340 | *<0.001* | 0.010 / 0.076 |
| *27 individuals;* | % Time in association at hotspot | -0.079 | 0.026 | -3.030 | *0.003* |  |
| *527 follows* | **Controls** |  |  |  |  |  |
|  | Fruit availability | 0.005 | 0.003 | 1.605 | *0.110* |  |
|  | Active period duration | 0.007 | 0.004 | 1.725 | *0.085* |  |
|  | Rainfall | 0.001 | 0.001 | 0.762 | *0.447* |  |
|  | **Random effects** | **Variance** | **SD** |  |  |  |
|  | Focal ID (Intercept) | 0.004 | 0.064 |  |  |  |
|  | Follow ID (Intercept) | 0.008 | 0.087 |  |  |  |
|  | Residual | 0.177 | 0.421 |  |  |  |
| **Model2_Time_M** | **log(Time in a hotspot)** *(Mother)* | **Fixed effects** |  |  |  |  |  |
| *n = 2932 observations;* | (Intercept) | 3.816 | 0.045 | 84.839 | *<0.001* | 0.001 / 0.047 |
| *22 individuals;* | % Time in association at hotspot | -0.007 | 0.016 | -0.440 | *0.660* |  |
| *899 follows* | **Controls** |  |  |  |  |  |
|  | Fruit availability | 0.003 | 0.003 | 1.210 | *0.228* |  |
|  | Active period duration | 0.001 | 0.003 | 0.290 | *0.770* |  |
|  | Rainfall | 0.000 | 0.000 | -1.000 | *0.321* |  |
|  | **Random effects** | **Variance** | **SD** |  |  |  |
|  | Focal ID (Intercept) | 0.001 | 0.023 |  |  |  |
|  | Follow ID (Intercept) | 0.007 | 0.081 |  |  |  |
|  | Residual | 0.157 | 0.396 |  |  |  |
| **Model2_Time_I** | **log(Time in a hotspot)**  *(Independent Immature)* | **Fixed effects** |  |  |  |  |  |
| *n = 1365 observations;* | (Intercept) | 3.874 | 0.058 | 67.222 | *<0.001* | 0.008 / 0.049 |
| *30 individuals;* | % Time in association at hotspot | -0.065 | 0.023 | -2.832 | *0.005* |  |
| *469 follows* | **Controls** |  |  |  |  |  |
|  | Fruit availability | 0.002 | 0.004 | 0.470 | *0.621* |  |
|  | Active period duration | -0.002 | 0.004 | -0.460 | *0.648* |  |
|  | Rainfall | 0.002 | 0.002 | 1.050 | *0.297* |  |
|  | **Random effects** | **Variance** | **SD** |  |  |  |
|  | Focal ID (Intercept) | 0.001 | 0.026 |  |  |  |
|  | Follow ID (Intercept) | 0.005 | 0.071 |  |  |  |
|  | Residual | 0.144 | 0.380 |  |  |  |
| **Model3_DPL_UF** | **Daily Path Length**  *(Unflanged Male)* | **Fixed effects** |  |  |  |  |  |
| *n = 28 observations;* | (Intercept) | 1425.462 | 405.335 | 3.517 | *0.002* | **0.184 / 0.218** |
| *13 individuals* | Presence Unflanged | -76.973 | 186.553 | -0.413 | *0.685* |  |
|  | Presence Flanged | 70.761 | 251.681 | 0.281 | *0.782* |  |
|  | Presence Mother | 308.720 | 233.137 | 1.324 | *0.201* |  |
|  | Presence Immature | -116.571 | 262.229 | -0.446 | *0.660* |  |
|  | **Controls** |  |  |  |  |  |
|  | Fruit availability | -7.372 | 27.751 | -0.266 | *0.793* |  |
|  | Rainfall | 11.472 | 16.134 | 0.711 | *0.486* |  |
|  | **Random effects** | **Variance** | **SD** |  |  |  |
|  | Focal ID (Intercept) | 7494.000 | 86.57 |  |  |  |
|  | Residual | 177300.000 | 421.07 |  |  |  |
| **Model3_DPL_FL** | **Daily Path Length** *(Flanged Male)* | **Fixed effects** |  |  |  |  |  |
| *n = 62 observations;* | (Intercept) | 969.040 | 190.248 | 5.094 | *<0.001* | **0.055 / NA** |
| *14 individuals* | Presence Unflanged | 117.439 | 219.719 | 0.534 | *0.595* |  |
|  | Presence Mother | 0.267 | 122.163 | 0.002 | *0.998* |  |
|  | Presence Immature | 23.230 | 132.755 | 0.175 | *0.862* |  |
|  | **Controls** |  |  |  |  |  |
|  | Fruit availability | 25.606 | 16.426 | 1.559 | *0.125* |  |
|  | Rainfall | -10.347 | 12.618 | -0.820 | *0.416* |  |
|  | **Random effects** | **Variance** | **SD** |  |  |  |
|  | Focal ID (Intercept) | 0.000 | 0.000 |  |  |  |
|  | Residual | 158359.000 | 397.900 |  |  |  |
| **Model3_DPL_M** | **Daily Path Length** *(Mother)* | **Fixed effects** |  |  |  |  |  |
| *n = 487 observations;* | (Intercept) | 1067.415 | 70.168 | 15.212 | *<0.001* | **0.030 / NA** |
| *16 individuals* | Presence Unflanged | 49.090 | 39.470 | 1.244 | *0.214* |  |
|  | Presence Flanged | 150.916 | 54.271 | 2.781 | *0.006* |  |
|  | Presence Mother | 68.382 | 47.844 | 1.429 | *0.154* |  |
|  | Presence Immature | -36.500 | 46.543 | -0.784 | *0.443* |  |
|  | **Controls** |  |  |  |  |  |
|  | Fruit availability | -1.515 | 6.624 | -0.229 | *0.819* |  |
|  | Rainfall | -0.653 | 0.928 | -0.703 | *0.482* |  |
|  | **Random effects** | **Variance** | **SD** |  |  |  |
|  | Focal ID (Intercept) | 0.000 | 0.000 |  |  |  |
|  | Residual | 161135.000 | 401.400 |  |  |  |
| **Model3_DPL_I** | **Daily Path Length** *(Independent Immature)* | **Fixed effects** |  |  |  |  |  |
| *n = 114 observations;* | (Intercept) | 1438.208 | 175.308 | 8.204 | *<0.001* | **0.030 / 0.209** |
| *20 individuals* | Presence Unflanged | 6.002 | 84.696 | 0.071 | *0.944* |  |
|  | Presence Flanged | 137.547 | 116.906 | 1.177 | *0.242* |  |
|  | Presence Mother | 16.063 | 90.255 | 0.178 | *0.859* |  |
|  | Presence Immature | -4.041 | 104.576 | -0.039 | *0.969* |  |
|  | **Controls** |  |  |  |  |  |
|  | Fruit availability | -21.758 | 15.226 | -1.429 | *0.156* |  |
|  | Rainfall | -4.198 | 5.111 | -0.821 | *0.413* |  |
|  | **Random effects** | **Variance** | **SD** |  |  |  |
|  | Focal ID (Intercept) | 36731.000 | 191.700 |  |  |  |
|  | Residual | 161942.000 | 402.200 |  |  |  |
| **Model3_Sin_UF** | **Daily Sinuosity**  *(Unflanged Male)* | **Fixed effects** |  |  |  |  |  |
| *n = 28 observations;* | (Intercept) | 0.001 | 0.116 | -0.044 | *0.965* | **0.427 / 0.642** |
| *13 individuals* | Presence Unflanged | 0.007 | 0.018 | 0.375 | *0.712* |  |
|  | Presence Flanged | 0.243 | 0.024 | 1.019 | *0.322* |  |
|  | Presence Mother | -0.014 | 0.022 | -0.623 | *0.541* |  |
|  | Presence Immature | 0.061 | 0.026 | 2.361 | *0.025* |  |
|  | **Controls** |  |  |  |  |  |
|  | Fruit availability | -0.002 | 0.003 | -0.550 | *0.589* |  |
|  | Total waypoints per path | 0.004 | 0.001 | 2.861 | *0.008* |  |
|  | Rainfall | -0.003 | 0.002 | -2.093 | *0.046* |  |
|  | **Random effects** | **Variance** | **SD** |  |  |  |
|  | Focal ID (Intercept) | 0.001 | 0.027 |  |  |  |
|  | Residual | 0.001 | 0.035 |  |  |  |
| **Model3_Sin_FL** | **Daily Sinuosity**  *(Flanged Male)* | **Fixed effects** |  |  |  |  |  |
| *n = 65 observations;* | (Intercept) | 0.127 | 0.054 | 2.337 | *0.023* | **0.195 / NA** |
| *14 individuals* | Presence Unflanged | -0.039 | 0.027 | -1.431 | *0.158* |  |
|  | Presence Mother | 0.004 | 0.015 | 0.250 | *0.804* |  |
|  | Presence Immature | 0.010 | 0.017 | 0.571 | *0.571* |  |
|  | **Controls** |  |  |  |  |  |
|  | Fruit availability | -0.004 | 0.002 | -1.869 | *0.067* |  |
|  | Total waypoints per path | 0.003 | 0.001 | 2.296 | *0.005* |  |
|  | Rainfall | 0.003 | 0.002 | 1.601 | *0.115* |  |
|  | **Random effects** | **Variance** | **SD** |  |  |  |
|  | Focal ID (Intercept) | 0.000 | 0.000 |  |  |  |
|  | Residual | 0.002 | 0.050 |  |  |  |
| **Model3_Sin_M** | **Daily Sinuosity**  *(Mother)* | **Fixed effects** |  |  |  |  |  |
| *n = 495 observations;* | (Intercept) | 0.139 | 0.025 | 5.485 | *<0.001* | **0.077 / 0.084** |
| *16 individuals* | Presence Unflanged | -0.005 | 0.005 | -0.994 | *0.321* |  |
|  | Presence Flanged | -0.013 | 0.007 | -2.002 | *0.046* |  |
|  | Presence Mother | -0.005 | 0.006 | -0.763 | *0.466* |  |
|  | Presence Immature | 0.003 | 0.006 | 0.600 | *0.549* |  |
|  | **Controls** |  |  |  |  |  |
|  | Fruit availability | 0.002 | 0.001 | 2.080 | *0.038* |  |
|  | Total waypoints per path | 0.002 | 0.000 | 5.817 | *<0.001* |  |
|  | Rainfall | 0.000 | 0.000 | 1.642 | *0.101* |  |
|  | **Random effects** | **Variance** | **SD** |  |  |  |
|  | Focal ID (Intercept) | 0.000 | 0.004 |  |  |  |
|  | Residual | 0.002 | 0.049 |  |  |  |
| **Model3_Sin_I** | **Daily Sinuosity**  *(Independent Immature)* | **Fixed effects** |  |  |  |  |  |
| *n = 119 observations;* | (Intercept) | 0.271 | 0.040 | 6.700 | *<0.001* | **0.059 / 0.124** |
| *21 individuals* | Presence Unflanged | -0.006 | 0.008 | -0.771 | *0.442* |  |
|  | Presence Flanged | -0.022 | 0.011 | -1.991 | *0.049* |  |
|  | Presence Mother | 0.010 | 0.009 | 1.111 | *0.269* |  |
|  | Presence Immature | 0.007 | 0.010 | 0.641 | *0.523* |  |
|  | **Controls** |  |  |  |  |  |
|  | Fruit availability | 0.001 | 0.001 | 0.702 | *0.484* |  |
|  | Total waypoints per path | -0.000 | 0.001 | -0.299 | *0.766* |  |
|  | Rainfall | 0.000 | 0.001 | 0.426 | *0.671* |  |
|  | **Random effects** | **Variance** | **SD** |  |  |  |
|  | Focal ID (Intercept) | 0.000 | 0.011 |  |  |  |
|  | Residual | 0.002 | 0.042 |  |  |  |
| Model3_NrH_UF | **Number of hotspots visited per day**  *(Unflanged male)* | **Fixed effects** |  |  |  |  |  |
| *n = 44 observations;* | (Intercept) | 1.607 | 0.903 | 1.780 | *0.075* | 0.026 / 0.027 |
| *18 individuals* | Presence Unflanged | -0.064 | 0.149 | -0.432 | *0.666* |  |
|  | Presence Flanged | 0.049 | 0.170 | 0.289 | *0.773* |  |
|  | Presence Mother | -0.204 | 0.156 | -1.311 | *0.190* |  |
|  | Presence Immature | -0.178 | 0.168 | -1.059 | *0.290* |  |
|  | **Controls** |  |  |  |  |  |
|  | Fruit availability | 0.009 | 0.025 | 0.355 | *0.723* |  |
|  | Active period duration | -0.007 | 0.065 | -0.109 | *0.913* |  |
|  | Rainfall | 0.009 | 0.014 | 0.630 | *0.529* |  |
|  | **Random effects** | **Variance** | **SD** |  |  |  |
|  | Focal ID (Intercept) | 0.000 | 0.000 |  |  |  |
| Model3_NrH_FL | **Number of hotspots visited per day**  *(Flanged male)* | **Fixed effects** |  |  |  |  |  |
| *n = 90 observations;* | (Intercept) | 0.749 | 0.389 | 1.925 | *0.054* | 0.026 / 0.027 |
| *19 individuals* | Presence Unflanged | -0.196 | 0.137 | -1.433 | *0.152* |  |
|  | Presence Flanged | -0.073 | 0.178 | -0.409 | *0.683* |  |
|  | Presence Mother | 0.088 | 0.078 | 1.124 | *0.261* |  |
|  | Presence Immature | 0.076 | 0.092 | 0.828 | *0.408* |  |
|  | **Controls** |  |  |  |  |  |
|  | Fruit availability | 0.010 | 0.012 | 0.867 | *0.386* |  |
|  | Active period duration | 0.062 | 0.035 | 1.762 | *0.078* |  |
|  | Rainfall | 0.008 | 0.008 | 0.990 | *0.322* |  |
|  | **Random effects** | **Variance** | **SD** |  |  |  |
|  | Focal ID (Intercept) | 0.001 | 0.023 |  |  |  |
| Model3_NrH_M | **Number of hotspots visited per day**  *(Mother)* | **Fixed effects** |  |  |  |  |  |
| *n = 600 observations;* | (Intercept) | 0.646 | 0.238 | 2.717 | *0.007* | 0.011 / 0.022 |
| *19 individuals* | Presence Unflanged | -0.116 | 0.038 | -3.039 | *0.002* |  |
|  | Presence Flanged | -0.102 | 0.051 | -2.015 | *0.044* |  |
|  | Presence Mother | -0.061 | 0.046 | -1.349 | *0.177* |  |
|  | Presence Immature | 0.018 | 0.042 | 0.433 | *0.665* |  |
|  | **Controls** |  |  |  |  |  |
|  | Fruit availability | 0.003 | 0.006 | 0.501 | *0.616* |  |
|  | Active period duration | 0.080 | 0.020 | 3.900 | *<0.001* |  |
|  | Rainfall | -0.000 | 0.001 | -0.461 | *0.645* |  |
|  | **Random effects** | **Variance** | **SD** |  |  |  |
|  | Focal ID (Intercept) | 0.009 | 0.092 |  |  |  |
| Model3_NrH_I | **Number of hotspots visited per day**  *(Independent immature)* | **Fixed effects** |  |  |  |  |  |
| *n = 163 observations;* | (Intercept) | 0.882 | 0.418 | 2.111 | *0.035* | 0.017 / 0.076 |
| *24 individuals* | Presence Unflanged | -0.104 | 0.071 | -1.453 | *0.146* |  |
|  | Presence Flanged | 0.058 | 0.092 | 0.632 | *0.527* |  |
|  | Presence Mother | -0.130 | 0.075 | -1.727 | *0.084* |  |
|  | Presence Immature | -0.125 | 0.083 | -1.505 | *0.132* |  |
|  | **Controls** |  |  |  |  |  |
|  | Fruit availability | 0.004 | 0.012 | 0.372 | *0.710* |  |
|  | Active period duration | 0.058 | 0.034 | 1.680 | *0.093* |  |
|  | Rainfall | -0.005 | 0.005 | -0.947 | *0.344* |  |
|  | **Random effects** | **Variance** | **SD** |  |  |  |
|  | Focal ID (Intercept) | 0.039 | 0.198 |  |  |  |
| Model3_Time_UF | **log(Time in a hotspot)** *(Unflanged male)* | **Fixed effects** |  |  |  |  |  |
| *n = 610 observations;* | (Intercept) | 3.898 | 0.077 | 50.636 | *<0.001* | 0.008 / 0.018 |
| *39 individuals;* | Presence Unflanged | 0.030 | 0.068 | 0.445 | *0.657* |  |
| *259 follows* | Presence Flanged | -0.030 | 0.097 | -0.310 | *0.757* |  |
|  | Presence Mother | -0.067 | 0.049 | -1.366 | *0.173* |  |
|  | Presence Immature | 0.002 | 0.052 | 0.041 | *0.967* |  |
|  | **Controls** |  |  |  |  |  |
|  | Fruit availability | -0.004 | 0.006 | -0.773 | *0.440* |  |
|  | Active period duration | 0.004 | 0.005 | 0.964 | *0.336* |  |
|  | Rainfall | -0.001 | 0.002 | -0.551 | *0.582* |  |
|  | **Random effects** | **Variance** | **SD** |  |  |  |
|  | Focal ID (Intercept) | 0.000 | 0.000 |  |  |  |
|  | Follow ID (Intercept) | 0.002 | 0.040 |  |  |  |
|  | Residual | 0.156 | 0.395 |  |  |  |
| Model3_Time_FL | **log(Time in a hotspot)** *(Flanged male)* | **Fixed effects** |  |  |  |  |  |
| *n = 1664 observations;* | (Intercept) | 3.813 | 0.056 | 67.116 | *<0.001* | 0.004 / 0.078 |
| *27 individuals;* | Presence Unflanged | 0.009 | 0.154 | -0.062 | *0.951* |  |
| *527 follows* | Presence Flanged | -0.049 | 0.251 | -0.197 | *0.884* |  |
|  | Presence Mother | 0.038 | 0.046 | 0.714 | *0.476* |  |
|  | Presence Immature | 0.034 | 0.060 | 0.559 | *0.576* |  |
|  | **Controls** |  |  |  |  |  |
|  | Fruit availability | 0.006 | 0.003 | 1.817 | *0.070* |  |
|  | Active period duration | 0.005 | 0.004 | 1.249 | *0.212* |  |
|  | Rainfall | -0.001 | 0.001 | 0.558 | *0.577* |  |
|  | **Random effects** | **Variance** | **SD** |  |  |  |
|  | Focal ID (Intercept) | 0.010 | 0.098 |  |  |  |
|  | Follow ID (Intercept) | 0.005 | 0.068 |  |  |  |
|  | Residual | 0.177 | 0.421 |  |  |  |
| Model3_Time_M | **log(Time in a hotspot)** *(Mother)* | **Fixed effects** |  |  |  |  |  |
| *n = 2932 observations;* | (Intercept) | 3.798 | 0.045 | 84.767 | *<0.001* | 0.007 / 0.049 |
| *22 individuals;* | Presence Unflanged | 0.019 | 0.021 | 0.881 | *0.379* |  |
| *899 follows;* | Presence Flanged | 0.123 | 0.034 | 3.592 | *<0.001* |  |
|  | Presence Mother | -0.061 | 0.028 | -2.120 | *0.034* |  |
|  | Presence Immature | -0.015 | 0.023 | -0.648 | *0.517* |  |
|  | **Controls** |  |  |  |  |  |
|  | Fruit availability | 0.004 | 0.003 | 1.431 | *0.153* |  |
|  | Active period duration | 0.001 | 0.003 | 0.413 | *0.680* |  |
|  | Rainfall | -0.000 | 0.000 | -1.161 | *0.246* |  |
|  | **Random effects** | **Variance** | **SD** |  |  |  |
|  | Focal ID (Intercept) | 0.006 | 0.077 |  |  |  |
|  | Follow ID (Intercept) | 0.001 | 0.030 |  |  |  |
|  | Residual | 0.157 | 0.396 |  |  |  |
| Model3_Time_I | **log(Time in a hotspot)** (*Independent immature*) | **Fixed effects** |  |  |  |  |  |
| *n = 1365 observations;* | (Intercept) | 3.851 | 0.044 | 65.400 | *<0.001* | 0.008 / 0.054 |
| *30 individuals;* | Presence Unflanged | -0.004 | 0.055 | -0.111 | *0.912* |  |
| *469 follows;* | Presence Flanged | 0.062 | 0.049 | 1.293 | *0.197* |  |
|  | Presence Mother | -0.076 | 0.042 | -2.337 | *0.020* |  |
|  | Presence Immature | -0.081 | 0.062 | -0.018 | *0.985* |  |
|  | **Controls** |  |  |  |  |  |
|  | Fruit availability | 0.001 | 0.026 | 0.315 | *0.753* |  |
|  | Active period duration | -0.002 | 0.072 | -0.460 | *0.646* |  |
|  | Rainfall | 0.002 | 0.045 | 0.964 | *0.336* |  |
|  | **Random effects** | **Variance** | **SD** |  |  |  |
|  | Focal ID (Intercept) | 0.000 | 0.000 |  |  |  |
|  | Follow ID (Intercept) | 0.008 | 0.089 |  |  |  |
|  | Residual | 0.107 | 0.328 |  |  |  |

***Additional table 3. Effects of active period duration on orangutan daily path length***

| **Model1_DPL:  lmer(DPL ~ Class + TimeInAssociation + FruitAvailability + Rainfall + (1 | focalID)** | | |
| --- | --- | --- |
| **Predictor** | **Estimate ± SE** | **t** |
| (Intercept) | 1033.60 ± 74.96 | 13.79 |
| Class: Independent Immature | 78.07 ± 73.16 | 1.07 |
| Class: Mother | -25.90 ± 74.69 | -0.35 |
| Class: Unflanged Male | 200.29 ± 87.66 | 2.29 |
| Time in Association | 68.67 ± 32.07 | 2.14 |
| Fruit Availability | 10.08 ± 5.11 | 1.97 |
| Rainfall | -0.55 ± 0.96 | -0.58 |
| *Model fit: AIC = 14643.4, BIC = 14687.3, logLik = -7312.7* | | |
| **Model1b_DPL:  lmer(DPL ~ Class + TimeInAssociation + FruitAvailability + ActivePeriodDuration + Rainfall + (1 | focalID)** | | |
| **Predictor** | **Estimate ± SE** | **t** |
| (Intercept) | -24.38 ± 182.47 | -0.13 |
| Class: Independent Immature | 36.30 ± 66.04 | 0.55 |
| Class: Mother | -82.80 ± 66.85 | -1.24 |
| Class: Unflanged Male | 179.66 ± 81.34 | 2.21 |
| Time in Association | 33.01 ± 31.93 | 1.03 |
| Fruit Availability | 9.01 ± 5.00 | 1.80 |
| Active Period Duration | 98.90 ± 15.71 | 6.29 |
| Rainfall | 0.30 ± 0.96 | 0.31 |
| *Model fit: AIC = 14607.1, BIC = 14655.9, logLik = -7293.6* | | |

To account for the fact that CTMM-based movement estimates are already scaled by observation time, our primary model (Model1_DPL) excluded follow duration and included only social and ecological predictors. This specification aligns with the CTMM framework, in which path length is inherently expressed as movement per unit time, making additional inclusion of follow duration potentially redundant.

To assess whether association effects were mediated through variation in active period duration, we also fitted an alternative model (Model1b_DPL) including active period duration. In this model, active period duration was significant, whereas Time in Party was no longer significant (*Additional table 3*). Model1b_DPL provided a substantially improved fit to the data (likelihood ratio test: χ² = 38.27, df = 1, p < 0.001), with a lower AIC (14607.1 vs. 14643.4). In the extended model, active period duration was a strong positive predictor of distance travelled (β = 98.90 ± 15.71, t = 6.2), whereas the effect of Time in Association was no longer statistically significant. Together, these results indicate that individuals in association do not travel farther per unit time; instead, association is linked to longer active (follow) periods, which in turn drive increases in total daily path length.

***Additional table 4. Effects of active period duration and GPS sampling resolution on path sinuosity.***

| ***Predictor*** | ***Estimate*** | ***SE*** | ***t value*** |
| --- | --- | --- | --- |
| *Intercept* | *0.2662* | *0.0208* | *12.78* |
| *Observation duration (Active Period Duration)* | *0.000804* | *0.00183* | *0.44* |
| *Residual waypoint number (Sampling resolution)* | *0.003864* | *0.000388* | *9.97* |
| ***Random effects*** |  |  |  |
| *Focal ID (intercept) variance = 0.000405 (SD = 0.0201)*  *Residual variance = 0.002764 (SD = 0.0526)* |  |  |  |

*Linear mixed model testing the effects of active period duration and residual waypoint number on path sinuosity. Residual waypoint number represents variation in sampling resolution independent of active period duration. n = 992 observations, 72 individuals.*

Including total waypoint number significantly improved model fit for path sinuosity (likelihood ratio test comparing Model1_Sin with and without number of waypoints (sampling resolution): χ² = 42.86, df = 1, p < 0.001). However, waypoint number was strongly correlated with observation duration due to fixed sampling intervals (Pearson’s r = 0.77, p < 0.001), indicating that its effect largely reflects longer follows rather than increased sampling resolution.

To disentangle these effects, we regressed total waypoint number against active period duration and used the residuals as a measure of sampling resolution independent of active period duration. In a combined model including both predictors, residual waypoint number had a strong positive effect on path, whereas active period duration had no detectable effect (*Additional table 4)*. These results indicate that path sinuosity is driven by GPS sampling resolution rather than active period duration, with higher-resolution tracks yielding greater estimated sinuosity.
